# Supplementary material
Source: Elsevier journal article supplement (https://www.sciencedirect.com/science/article/pii/S2255553615000154)
Supplement: mmc1 [file S2255553615000154:mmc1.pdf]

**\* Rede Brasileira de Pesquisas Neonatais (Brazilian Neonatal Research Network) - List of authors per center:**

- UNESP - Universidade Estadual Paulista, Hospital das Clínicas da Faculdade de Medicina de Botucatu: Maria Regina Bentlin, Ligia M. S. S. Rugolo.
- UEL - Universidade Estadual de Londrina: Ligia S. L. Ferrari.
- Fiocruz - Instituto Nacional de Saúde da Mulher, Criança e Adolescente Fernandes Figueira: Maria E. L. Moreira.
- PUC - Pontifícia Universidade Católica do Rio Grande do Sul, Hospital São Lucas: Renato M. Fiori.
- Universidade Federal do Rio Grande do Sul, Hospital de Clínicas de Porto Alegre: Renato S. Procianoy.
- UNIFESP - Universidade Federal de São Paulo, Hospital São Paulo: Ruth Guinsburg.
- USP - Universidade de São Paulo, Instituto da Criança do Hospital das Clínicas da Faculdade de Medicina da Universidade de São Paulo: Werther B. Carvalho.
- USP - Universidade de São Paulo, Hospital de Clínicas de Ribeirão Preto: Marisa M. M. Pinhata.
- UNICAMP - Universidade Estadual de Campinas, Centro de Atenção Integral à Saúde da Mulher: Sérgio T.M. Marba.
- UERJ - Universidade do Estado do Rio de Janeiro, Hospital Universitário Pedro Ernesto: José L.B. Duarte.
- UFMG - Universidade Federal de Minas Gerais, Hospital das Clínicas: Lêni M. Anchieta.
- UFPR - Universidade Federal do Paraná, Hospital das Clínicas: Regina V. C. Silva.
- FCMMG - Faculdade de Ciências Médicas de Minas Gerais, Maternidade Hilda Brandão: Navantino Alves Filho.
- UFU - Universidade Federal de Uberlândia, Hospital das Clínicas: Vânia O. S. Abdallah.
- IMIP - Instituto de Medicina Integral Professor Fernando Figueira: Ana L. Macedo.
- UFMA - Universidade Federal do Maranhão, Hospital Universitário: Marynéa V. Nunes.
